# Supplementary material for: AI usage among medical students in Palestine and demonstrates AI's capability in conducting the research itself: A Cross-Sectional Study
Source: Research Square preprint supplement (doi:10.21203/rs.3.rs-5721425/v1), 2025-04-28
Supplement: Supplementary file 1 [file 71e2b1e411a7514dd5c4088c.xlsx]

## Sheet: Sheet1
Purpose	Overall (%)	Preclinical (%)	Clinical (%)	Internship (%)
Academic Support	0.65	0.72	0.62	0.58
Research Assistance	0.58	0.41	0.64	0.72
Clinical Training	0.31	0.18	0.39	0.36
