# Supplementary material for: AI usage among medical students in Palestine and demonstrates AI's capability in conducting the research itself: A Cross-Sectional Study
Source: Research Square preprint supplement (doi:10.21203/rs.3.rs-5721425/v1), 2025-04-28
Supplement: Supplementary file 2 [file 89e3ce9ed58686cea6e6b14a.docx]

**Consent Form**

Before proceeding, please read the following information carefully:

**Purpose of the Study:** This study aims to explore the role and impact of Artificial Intelligence (AI) in medical education, focusing on its usage among medical students.

**Voluntary Participation:** Participation in this study is completely voluntary. You have the right to decline to answer any question or to withdraw from the study at any point without any penalty.

**Confidentiality:** All responses will be anonymized and kept strictly confidential. The data collected will be used solely for research purposes and stored securely.

**Duration:** Completing the questionnaire will take approximately 5-10 minutes.

**Contact Information:** If you have any questions about the study, please contact the research team at ( drmahmoudyousef2001@gmail.com/00972592497577).

By proceeding to complete this questionnaire, you are indicating your informed consent to participate in this study. ( yes/ no).

Thank you for your time and valuable contribution.

# This revised questionnaire is designed to gather information about AI usage among medical students, focusing on its impact on academic performance, clinical skills, time management, challenges, and ethical considerations. Please respond to each question accurately. Some questions allow multiple selections as noted.

# AI Usage Questionnaire for Medical Students

## 1. Demographic Information

1.1 Age: _____

1.2 Gender: _____

1.3 Year of Study (e.g., 1st, 2nd, 3rd year, etc.): _____

1.4 University (e.g., An-Najah National University, Al-Quds University, etc.): _____

1.5 Have you had formal training on AI or digital tools? (Yes/No)

- If yes, please specify the type of training: __________

## 2. AI Usage

2.1 How frequently do you use AI applications for your studies?

- Daily

- Weekly

- Monthly

- Rarely

- Never

2.2 Which AI applications do you use most frequently? (e.g., ChatGPT, research tools, diagnostic tools): __________

2.3 What is your primary purpose for using AI? (Select all that apply)

- Study Aid (e.g., answering questions, clarifying concepts)

- Research Assistance (e.g., literature review, data analysis, manuscript drafting)

- Clinical Preparation (e.g., diagnostics, case simulations, procedural training)

- Time Management (e.g., scheduling study sessions)

- Other: __________

2.4 In what specific ways do you use AI? (Select all that apply)

- Answering questions and clarifying concepts

- Literature review

- Data analysis

- Manuscript preparation

- Clinical preparation (e.g., diagnostics, simulations)

- Study schedule management

- Other: __________

## 3. Impact of AI on Academic Performance

3.1 Have you noticed an improvement in your academic performance due to AI usage?

- Yes

- No

- Unsure

3.2 To what extent do you believe AI has enhanced your research skills?

- Significantly

- Moderately

- Slightly

- Not at all

3.3 On a scale of 1 to 5, how much has AI improved your academic performance?

- (1 = No improvement, 5 = Significant improvement)

## 4. Impact of AI on Clinical Competence

4.1 How has AI impacted your clinical skills (e.g., diagnostics, procedural training, decision-making)?

- Strong positive impact

- Moderate positive impact

- No impact

- Negative impact

4.2 In which clinical preparation tasks do you use AI? (Select all that apply)

- Simulating clinical cases

- Diagnostics

- Decision-making

- Procedural training (e.g., surgery simulations)

- Other: __________

4.3 On a scale of 1 to 5, how much has AI enhanced your clinical competence?

- (1 = No improvement, 5 = Significant improvement)

## 5. Impact of AI on Time Management

5.1 Has AI improved your time management in study and research tasks?

- Greatly

- Moderately

- Slightly

- Not at all

5.2 Which specific AI tools or functions help you with time management? (Select all that apply)

- Scheduling (e.g., managing study sessions)

- Automating repetitive tasks

- Quick access to resources

- Other: __________

5.3 On a scale of 1 to 5, how effectively has AI helped you manage your time?

- (1 = Not effective, 5 = Highly effective)

## 6. Challenges and Limitations

6.1 Have you encountered any challenges when using AI for academic or clinical purposes?

- Yes (please describe): __________

- No

6.2 Do you think AI has limitations in fully replacing certain tasks?

- Yes, particularly in areas such as: __________

- No, AI can replace most tasks

6.3 Have you experienced any technical barriers or access issues when using AI tools?

- Yes (please describe): __________

- No

## 7. Ethical Considerations

7.1 Are there ethical concerns associated with using AI in medical education or research (e.g., privacy, data security, algorithmic bias)?

- Yes (please elaborate): __________

- No

7.2 Should AI usage be monitored for ethical compliance?

- Yes

- No

## 8. Gender and Demographic Analysis

8.1 Do you think gender influences how students perceive or use AI tools?

- Yes (please describe your perspective): __________

- No

## 9. Over-Reliance on AI

9.1 Do you believe students risk over-relying on AI tools for learning or research?

- Yes (please describe your concerns): __________

- No

9.2 How do you ensure critical evaluation of AI-generated outputs in your academic or clinical work?

- __________

## 10. Future Recommendations

10.1 What specific AI functionalities or features would you recommend for better integration into medical education?

- __________

10.2 How can AI training programs be improved to address the needs of medical students?

- __________
