# Supplementary material for: AI usage among medical students in Palestine and demonstrates AI's capability in conducting the research itself: A Cross-Sectional Study
Source: Research Square preprint supplement (doi:10.21203/rs.3.rs-5721425/v1), 2025-04-28
Supplement: Supplementary file 3 [file 8efa76a1d3965d42d3820341.xlsx]

## Sheet: ورقة1
Characteristic	Value
Final Sample Size	550
Excluded Responses	40 (Incomplete/Invalid)
Female Students	370 (67%)
Male Students	180 (33%)
Mean Age (years)	22.8
Age Range (years)	18–25
Clinical Years Participants	43% (236 students)
Preclinical Years Participants	32% (176 students)
Internship Year Participants	25% (138 students)
Students at Al-Quds University	28% (154 students)
Students at Other Universities	72% (396 students)
